# Supplementary material for: Association of myocardial fibrosis detected by late gadolinium-enhanced MRI with clinical outcomes in patients with diabetes: a systematic review and meta-analysis
Source: HighWire-hosted journal article supplement (doi:10.1136/bmjopen-2021-055374), 2022-01-01

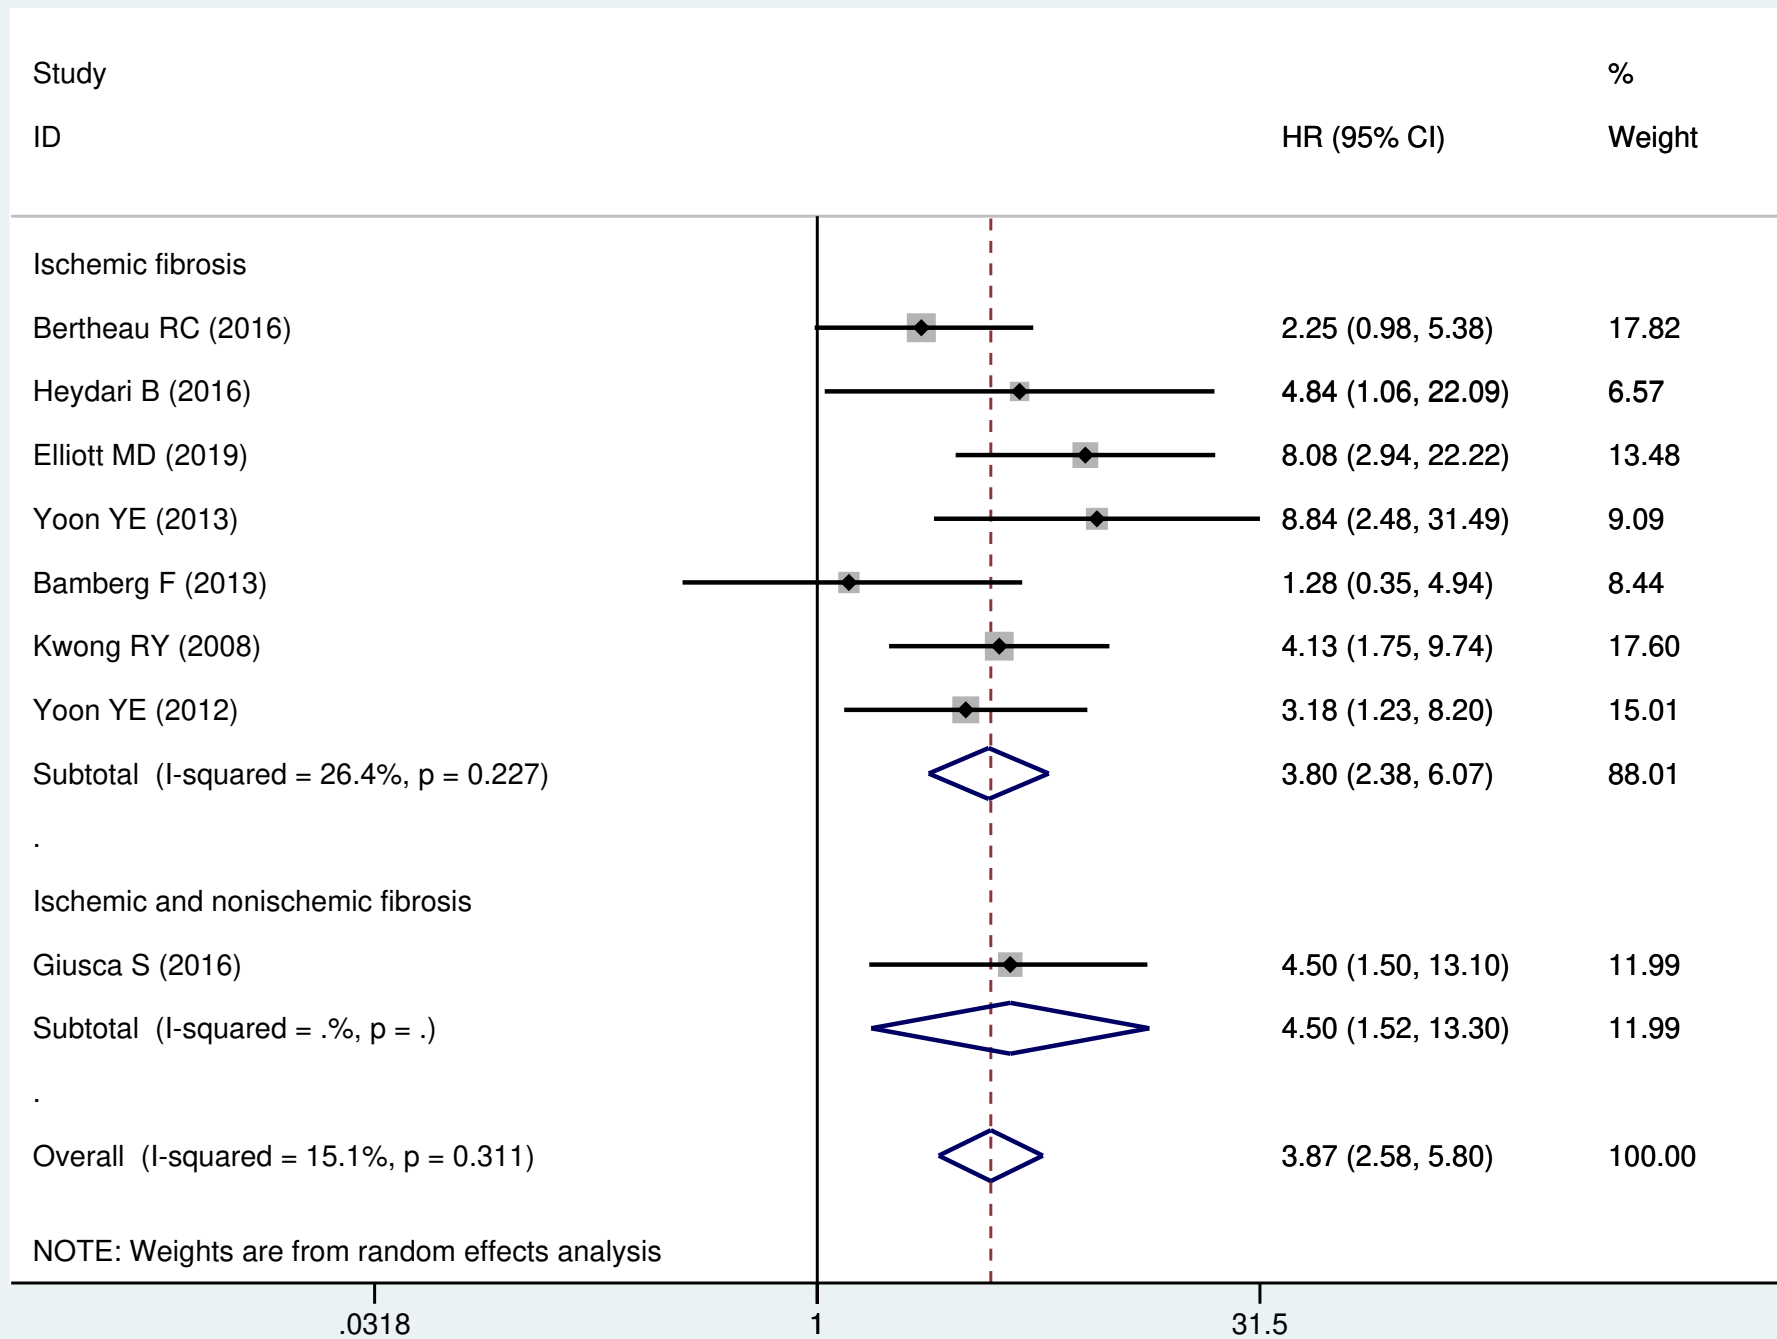

Supplement: bmjopen-2021-055374supp005_data_supplement.pdf [file bmjopen-2021-055374supp005_data_supplement.pdf]
